# Supplementary material for: Effect of Imipenem and Amikacin Combination against Multi-Drug Resistant Pseudomonas aeruginosa
Source: MDPI journal article supplement (doi:10.3390/antibiotics10111429), 2021-11-22
Supplement: s1 [file s1]

# Supplementary Data

Table S1: Distribution of *bla<sub>IMP</sub>* genotype among 45 isolated *P. aeruginosa*

| Infections                 | No.of isolates | <i>bla<sub>IMP</sub></i> positive isolates<br>No. (%) <sup>*,**</sup> |
|----------------------------|----------------|-----------------------------------------------------------------------|
| Wound                      | 17             | 6 (37.5%)                                                             |
| Ear infections             | 6              | 4 (25%)                                                               |
| Burn infections            | 5              | 3 (18.75%)                                                            |
| Chest infections           | 8              | 3 (18.75%)                                                            |
| Urinary tract infections   | 5              | 0                                                                     |
| Gastroenteritis infections | 4              | 0                                                                     |
| Total                      | 45             | 16 (35.6%) <sup>**</sup>                                              |

\*Percent correlated to total no. of positive isolates, \*\* percent correlated to total no of *P. aeruginosa* isolates.

Table S2: Distribution of *aac(6')-Ib* genotype among 45 isolated *P. aeruginosa*

| Infections                 | No.of isolates | <i>aac(6')-Ib</i> positive isolates<br>No. (%) <sup>*,**</sup> |
|----------------------------|----------------|----------------------------------------------------------------|
| Wound                      | 17             | 8 (42.1%)                                                      |
| Ear infections             | 6              | 2 (10.5%)                                                      |
| Burn infections            | 5              | 2 (10.5%)                                                      |
| Chest infections           | 8              | 3 (15.8%)                                                      |
| Urinary tract infections   | 5              | 2 (10.5%)                                                      |
| Gastroenteritis infections | 4              | 2 (10.5%)                                                      |
| Total                      | 45             | 19 (42.2%) <sup>**</sup>                                       |

\*Percent correlated to total no. of positive isolates, \*\* percent correlated to total no of *P. aeruginosa* isolates.

Table S3: Comparisons between different groups of *Pseudomonas aeruginosa* resistant to both Imipenem & Amikacin in different times

At 0.5x MIC

|      | Control group (I) | Amikacin group (II) | Imipenem group (III) | Combination group (IV) | P value |
|------|-------------------|---------------------|----------------------|------------------------|---------|
| 0 h  | 8.21±0.02         | 8.21±0.02           | 8.21±0.02            | 8.21±0.02              | 1       |
| 2 h  | 9.41±0.01         | 9.42±0.03           | 9.40±0.01            | 9.41±0.01              | 0.045*  |
| 4 h  | 11.96±0.01        | 11.95±0.02          | 11.96±0.02           | 9.30±0.02              | <0.001* |
| 8 h  | 10.20±0.02        | 10.20±0.01          | 10.20±0.01           | 9.21±0.01              | <0.001* |
| 12 h | 10.42±0           | 10.42±0.01          | 10.42±0.01           | 8.96±0.05              | <0.001* |
| 24 h | 10.47±0           | 10.47±0             | 10.47±0.01           | 7.48±0                 | <0.001* |

At 1 x MIC

|      | Control group (I) | Amikacin group (II) | Imipenem group (III) | Combination group (IV) | P value  |
|------|-------------------|---------------------|----------------------|------------------------|----------|
| 0 h  | 8.21±0.02         | 8.21±0.02           | 8.21±0.02            | 8.21±0.02              | <i>I</i> |
| 2 h  | 9.41±0.01         | 9.32±0.01           | 9.35±0.01            | 9.33±0.02              | <0.001*  |
| 4 h  | 11.96±0.01        | 9.19±0.03           | 9.21±0.03            | 9.05±0.03              | <0.001*  |
| 8 h  | 10.20±0.02        | 8.03±0.02           | 8.09±0.04            | 7.95±0.03              | <0.001*  |
| 12 h | 10.42±0           | 7.95±0.03           | 7.90±0.05            | 6.84±0.06              | <0.001*  |
| 24 h | 10.47±0           | 7±0.04              | 7.1±0.04             | 5 ±0.05                | <0.001*  |

At 2 x MIC

|      | Control group (I) | Amikacin group (II) | Imipenem group (III) | Combination group (IV) | P value  |
|------|-------------------|---------------------|----------------------|------------------------|----------|
| 0 h  | 8.21±0.02         | 8.21±0.02           | 8.21±0.02            | 8.21±0.02              | <i>I</i> |
| 2 h  | 9.41±0.01         | 9.07±0.02           | 9.08±0.02            | 8.02±0.02              | <0.001*  |
| 4 h  | 11.96±0.01        | 8.91±0.02           | 8.96±0.02            | 7.80±0.02              | <0.001*  |
| 8 h  | 10.20±0.02        | 7.84±0.03           | 7.82±0.02            | 6.71±0.07              | <0.001*  |
| 12 h | 10.42±0           | 6.88±0.04           | 6.85±0.02            | 5.71±0.05              | <0.001*  |
| 24 h | 10.47±0           | 6.78±0.04           | 6.68±0.06            | 4.59±0.08              | <0.001*  |

At 4 x MIC

|      | Control group (I) | Amikacin group (II) | Imipenem group (III) | Combination group (IV) | P value  |
|------|-------------------|---------------------|----------------------|------------------------|----------|
| 0 h  | 8.21±0.02         | 8.21±0.02           | 8.21±0.02            | 8.21±0.02              | <i>I</i> |
| 2 h  | 9.41±0.01         | 7.89±0.02           | 7.75±0.06            | 5.72±0.03              | <0.001*  |
| 4 h  | 11.96±0.01        | 7.58±0.08           | 7.71±0.03            | 5.68±0.05              | <0.001*  |
| 8 h  | 10.20±0.02        | 7.38±0.38           | 6.68±0.04            | 4.51±0.03              | <0.001*  |
| 12 h | 10.42±0           | 5.60±0.07           | 5.59±0.07            | 0±0                    | <0.001*  |
| 24 h | 10.47±0           | 0±0                 | 0±0                  | 0±0                    | <0.001*  |

Table S4: Comparisons between different groups of *Pseudomonas aeruginosa* resistant to Imipenem only in different times

At 0.5 x MIC

|      | Control group (I) | Amikacin group (II) | Imipenem group (III) | Combination group (IV) | P value  |
|------|-------------------|---------------------|----------------------|------------------------|----------|
| 0 h  | 8.21±0.02         | 8.21±0.02           | 8.21±0.02            | 8.21±0.02              | <i>I</i> |
| 2 h  | 9.41±0.01         | 8.90±0.02           | 9.09±0.02            | 9.04±0.02              | <0.001*  |
| 4 h  | 11.96±0.01        | 8.59±0.08           | 9.26±0.01            | 8.97±0.02              | <0.001*  |
| 8 h  | 10.20±0.02        | 7.57±0.09           | 9.29±0.03            | 8.73±0.08              | <0.001*  |
| 12 h | 10.42±0           | 6.58±0.04           | 9.41±0.01            | 8.19±0.10              | <0.001*  |
| 24 h | 10.47±0           | 5.53±0.04           | 10.02±0.01           | 7.26±0.11              | <0.001*  |

At 1 x MIC

|      | Control group (I) | Amikacin group (II) | Imipenem group (III) | Combination group (IV) | P value  |
|------|-------------------|---------------------|----------------------|------------------------|----------|
| 0 h  | 8.21±0.02         | 8.21±0.02           | 8.21±0.02            | 8.21±0.02              | <i>I</i> |
| 2 h  | 9.41±0.01         | 5.58±0.09           | 8.95±0.01            | 7.91±0.04              | <0.001*  |
| 4 h  | 11.96±0.01        | 4.51±0.03           | 8.53±0.08            | 7.52±0.01              | <0.001*  |
| 8 h  | 10.20±0.02        | 0±0                 | 7.93±0.02            | 6.90±0.03              | <0.001*  |
| 12 h | 10.42±0           | 0±0                 | 6.92±0.06            | 5.59±0.06              | <0.001*  |
| 24 h | 10.47±0           | 0±0                 | 6.20±0.05            | 4.17±0.06              | <0.001*  |

Table S5: Comparisons between different groups of *Pseudomonas aeruginosa* resistant to Amikacin only in different times

At 0.5 x MIC

|      | Control group (I) | Amikacin group (II) | Imipenem group (III) | Combination group (IV) | P value  |
|------|-------------------|---------------------|----------------------|------------------------|----------|
| 0 h  | 8.21±0.02         | 8.21±0.02           | 8.21±0.02            | 8.21±0.02              | <i>I</i> |
| 2 h  | 9.41±0.01         | 9.41±0.03           | 6.92±0.04            | 9.34±0.01              | <0.001*  |
| 4 h  | 11.96±0.01        | 11.95±0.04          | 6.54±0.05            | 9.28±0.02              | <0.001*  |
| 8 h  | 10.20±0.02        | 10.19±0.02          | 5.91±0.05            | 9.12±0.02              | <0.001*  |
| 12 h | 10.42±0           | 10.41±0.01          | 5.55±0.08            | 8.89±0.06              | <0.001*  |
| 24 h | 10.47±0           | 10.47±0.01          | 4.55±0.05            | 7.34±0.04              | <0.001*  |

At 1xMIC

|      | Control group (I) | Amikacin group (II) | Imipenem group (III) | Combination group (IV) | P value |
|------|-------------------|---------------------|----------------------|------------------------|---------|
| 0 h  | 8.21±0.02         | 8.21±0.02           | 8.21±0.02            | 8.21±0.02              | 1       |
| 2 h  | 9.41±0.01         | 8.97±0.02           | 5.57±0.02            | 7.85±0.05              | <0.001* |
| 4 h  | 11.96±0.01        | 7.72±0.08           | 4.64±0.04            | 7.57±0.06              | <0.001* |
| 8 h  | 10.20±0.02        | 6.88±0.06           | 0±0                  | 6.86±0.04              | <0.001* |
| 12 h | 10.42±0           | 6.58±0.08           | 0±0                  | 6.60±0.06              | <0.001* |
| 24 h | 10.47±0           | 6.21±0.04           | 0±0                  | 4.2±0.07               | <0.001* |

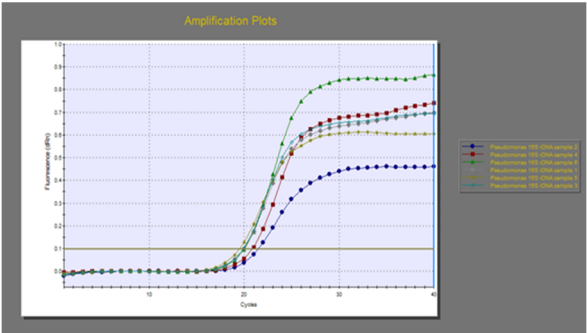

Figure S1 :*P. aeruginosa* 16s rDNA amplification plots

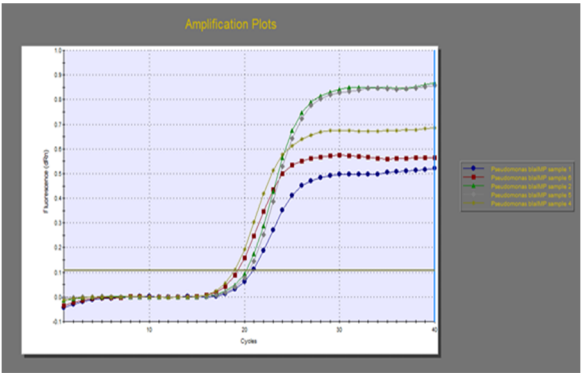

Figure S2:*P. aeruginosa* bla<sub>IMP</sub> amplification plots

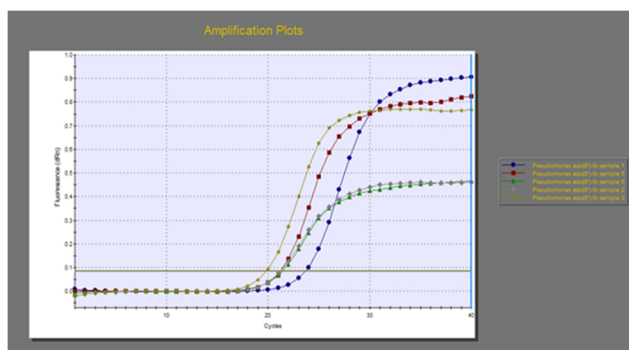

Figure S3 :*P. aeruginosa* bla<sub>aac6-Ib'</sub> amplification plots
